# Supplementary material for: Breast Cancer Cell Membrane Camouflaged Lipid Nanoparticles for Tumor-Targeted NIR-II Phototheranostics
Source: MDPI journal article supplement (doi:10.3390/pharmaceutics14071367), 2022-06-28
Supplement: s1 [file s1]

# Supporting Information

## Breast Cancer Cell Membrane Camouflaged Nanoparticles for Homologous-targeted NIR-II Phototheranostics

Mengze Xu<sup>1,2</sup>, Yu Yang<sup>3</sup>, Zhen Yuan<sup>1,2,\*</sup>

<sup>1</sup> Cancer Center, Faculty of Health Sciences, University of Macau, Macau 999078, P. R. China

<sup>2</sup> Centre for Cognitive and Brain Sciences, University of Macau, Macau 999078, China

<sup>3</sup>Institute of Molecular Medicine (IMM), Renji Hospital, Shanghai Jiao Tong University School of Medicine, and College of Chemistry and Chemical Engineering, Shanghai Jiao Tong University, Shanghai 200240, China

\* Corresponding author: E-mail: [zhenyuan@um.edu.mo](mailto:zhenyuan@um.edu.mo), Phone: +00 8538822 4989, Fax: +00 853 8822 2314

The photothermal conversion efficiency ( $\eta$ ) was calculated according to the Equation S1[Ref:1] :

$$\eta = \frac{hs(T_{max} - T_{surr}) - Q_{Dis}}{I(1 - 10^{-A1064})} \quad (S1)$$

Where  $h$  means the heat transfer coefficient,  $s$  represents the surface area of the container,  $T_{max}$  is equilibrium temperature,  $T_{surr}$  is the ambient temperature of the environment,  $Q_{Dis}$  is the heat dissipation from the light absorbed by the solvent and the container,  $I$  is the incident laser power density,  $A1064$  represents the absorption of sample at 1064 nm. The calculation of the  $hs$  is following the Equation (S2).

$$\tau_s = \frac{m_D c_D}{hs} \quad (S2)$$

Where  $\tau_s$  means the time constant for heat transfer of the system,  $m_D$  and  $c_D$  represents the mass and heat capacity ( $4.2 \text{ J} \cdot \text{g}^{-1} \cdot ^\circ\text{C}^{-1}$ ) of the solvent, respectively. The value of  $\tau_s$  is calculated according to the Equation (S3) and (S4).

$$t = -\tau_s \ln \theta \quad (S3)$$

$$\theta = \frac{T - T_{surr}}{T_{max} - T_{surr}} \quad (S4)$$

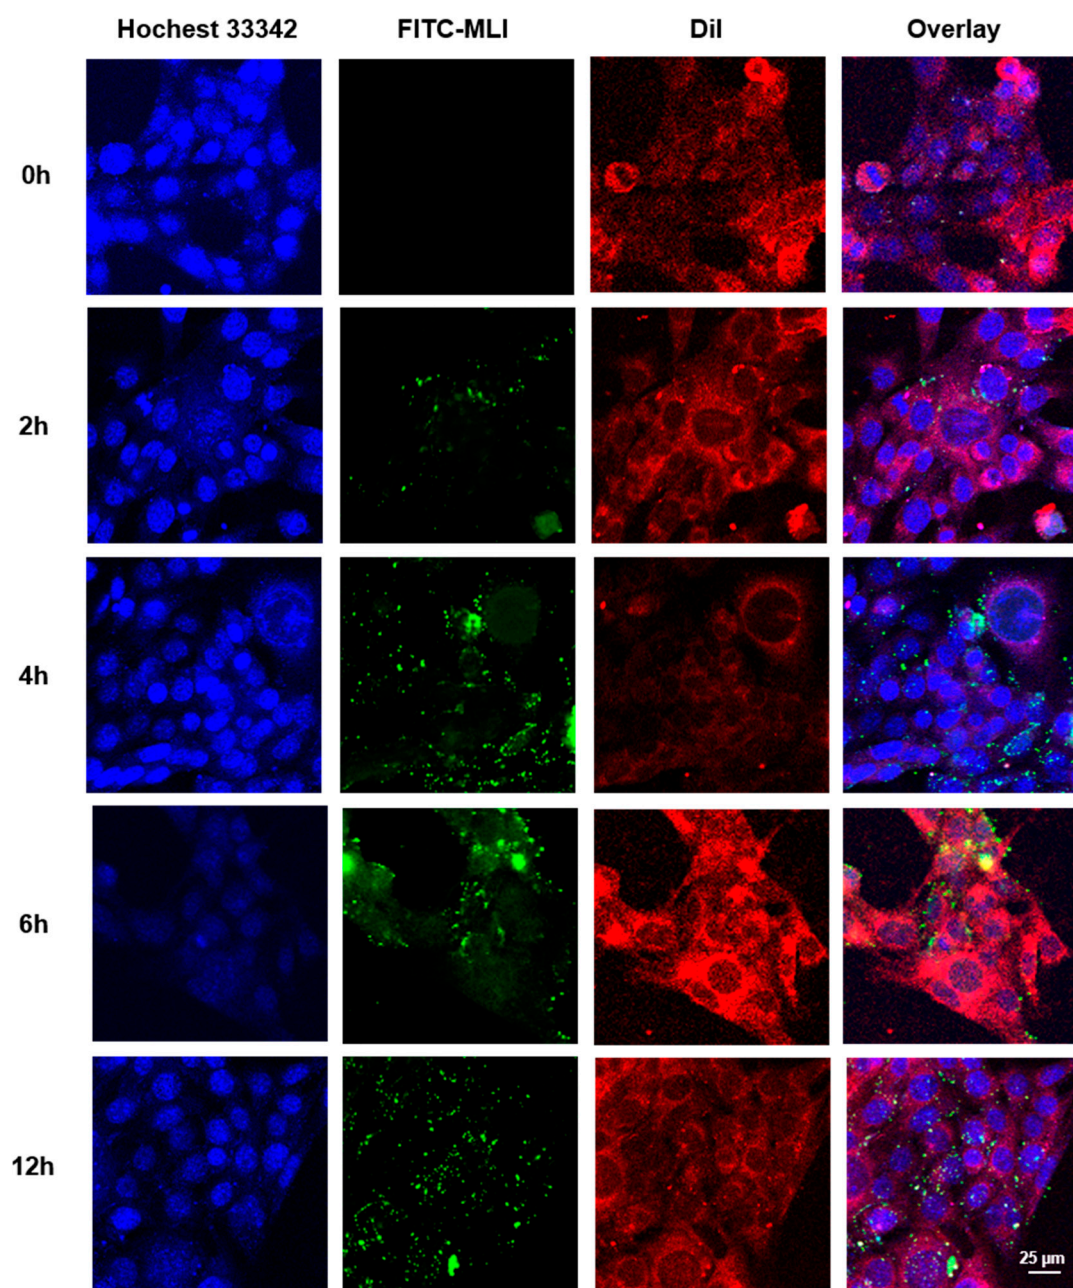

**Figure S1.** Cellular uptake of MLI to 4T1 cells at various incubation time. From left to right, Hoechst 33342-stained cell nuclei, FITC-labelled MLI, DiI-stained cell membrane and overlay images, respectively. All scale bars correspond to 25  $\mu\text{m}$ .

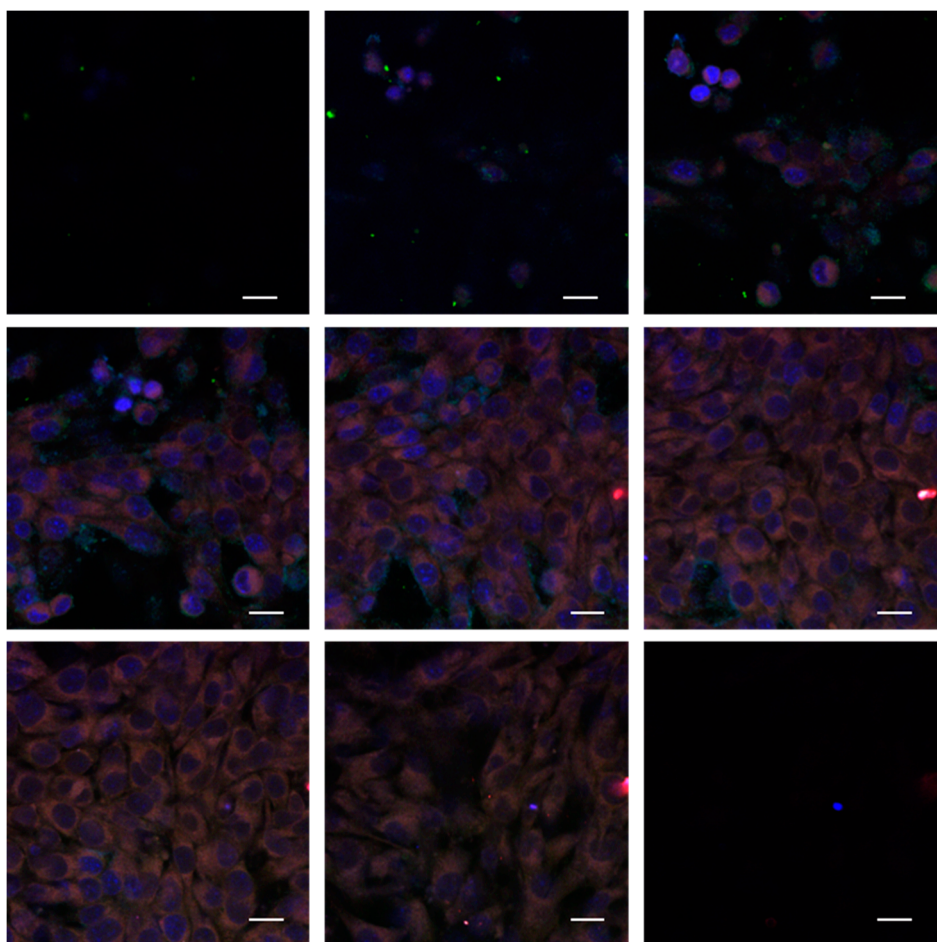

**Figure S2.** Z-stack confocal images of the Rhodamine B labeled LI, Hoechst 33342 and DiO dual-stained 4T1 cells. All scale bar corresponds to 50  $\mu\text{m}$ .

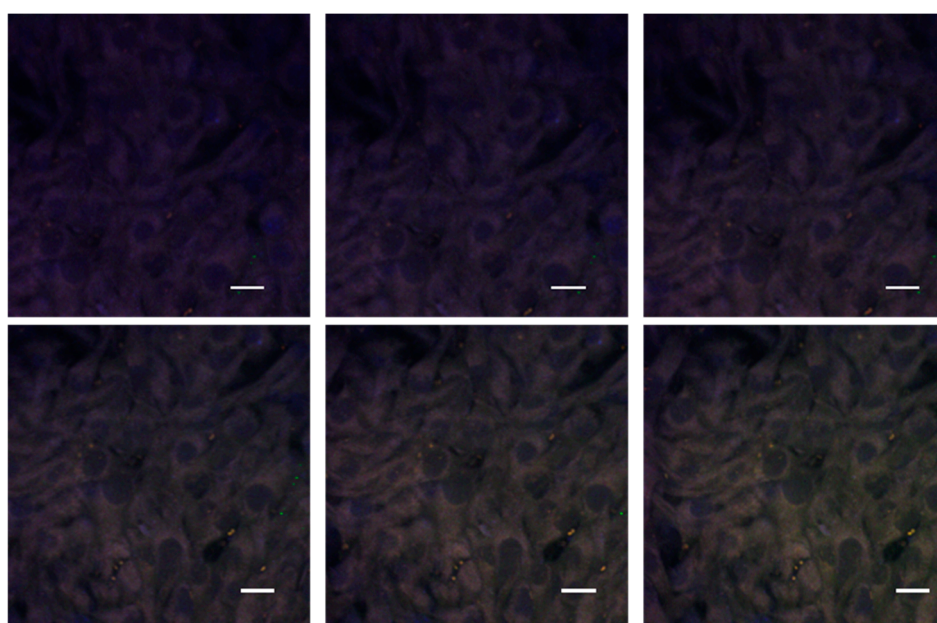

**Figure S3.** Z-stack confocal images of the Rhodamine B labeled MLI, Hoechst 33342 and DiO dual-stained 4T1 cells. All scale bar corresponds to 50  $\mu\text{m}$ .

**Reference:**

[1] Chen Z, Zhang Q, Zeng L, Zhang J, Liu Z, Zhang M, Zhang X, Xu H, Song H, Tao C. Light-triggered OVA release based on CuS@poly(lactide-co-glycolide acid) nanoparticles for synergistic photothermal-immunotherapy of tumor. *Pharmacol Res.* 2020 Aug; 158: 104902. doi: 10.1016/j.phrs.2020.104902.
